# Supplementary material for: Mo2C coated with Ni nanoparticles as the cathode catalyst towards efficient hydrogen evolution reaction: an experimental and computational investigation
Source: Royal Society of Chemistry journal article supplement (doi:10.1039/d4cp02356k), 2024-01-01
Supplement: d4cp02356k1.pdf [file d4cp02356k1.pdf]

## Electronic supplementary information

### **Mo<sub>2</sub>C coated with Ni nanoparticles as cathode catalyst towards efficient hydrogen evolution reaction: an experimental and computational investigation**

Chuan Liu,<sup>\*ab</sup> Xin Chu,<sup>a</sup> Yingqi Pi,<sup>a</sup> Chunshan Dong,<sup>a</sup> Yuhan Lei,<sup>a</sup> Wanwan Yao,<sup>a</sup>  
Bentian Zhang,<sup>a</sup> Zirong Li,<sup>\*ab</sup> Xuchun Wang<sup>ab</sup> and Ping Cheng<sup>\*bc</sup>

<sup>a</sup> *College of Chemistry and Materials Engineering, Anhui Science and Technology University, Bengbu, 233100, P. R. China*

<sup>b</sup> *Anhui Province Quartz Sand Purification and Photovoltaic Glass Engineering Research Center, Chuzhou, 233100, P. R. China*

<sup>c</sup> *College of Material and Chemistry, University of Shanghai for Science and Technology, Shanghai 200093, China*

*E-mail: [liuxc@ahstu.edu.cn](mailto:liuxc@ahstu.edu.cn) (Chuan Liu), [lizir@ahstu.edu.cn](mailto:lizir@ahstu.edu.cn) (Zirong Li), [chengp@usst.edu.cn](mailto:chengp@usst.edu.cn) (Ping Cheng)*

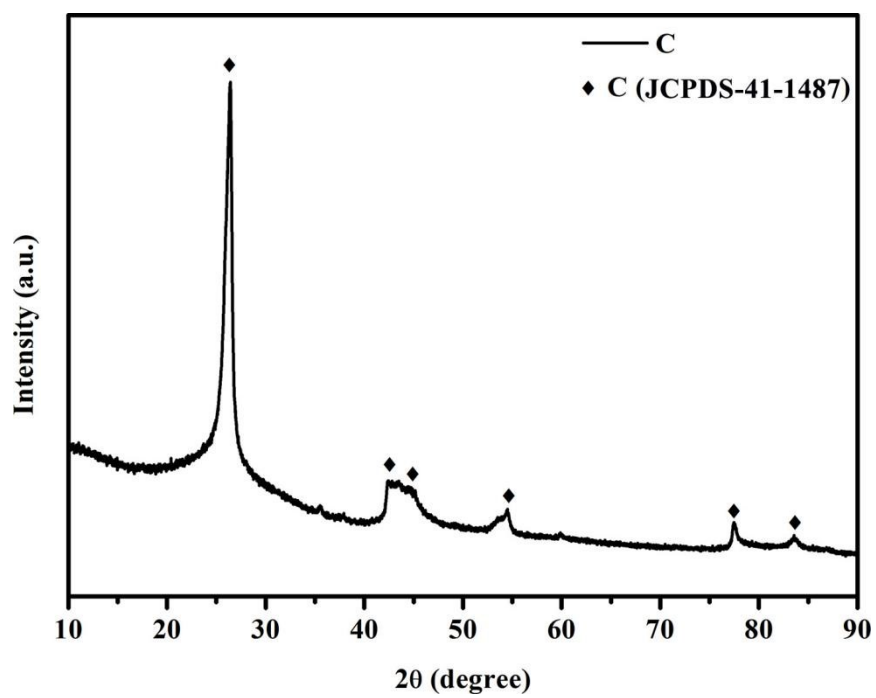

**Fig. S1** XRD pattern of fabricated C material.

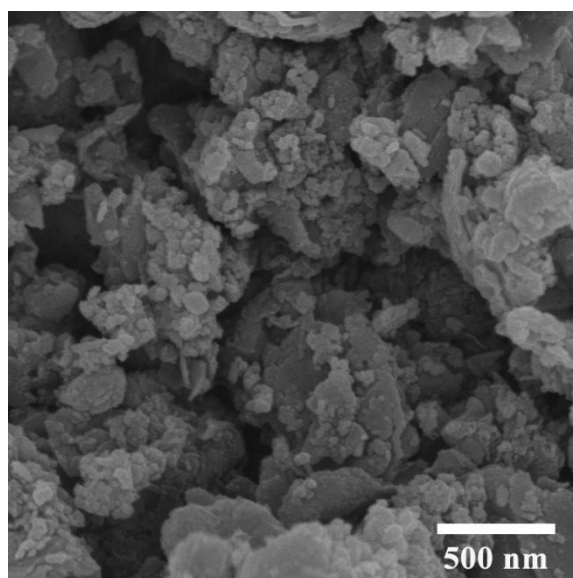

**Fig. S2** SEM image of synthesized alkynyl carbon.

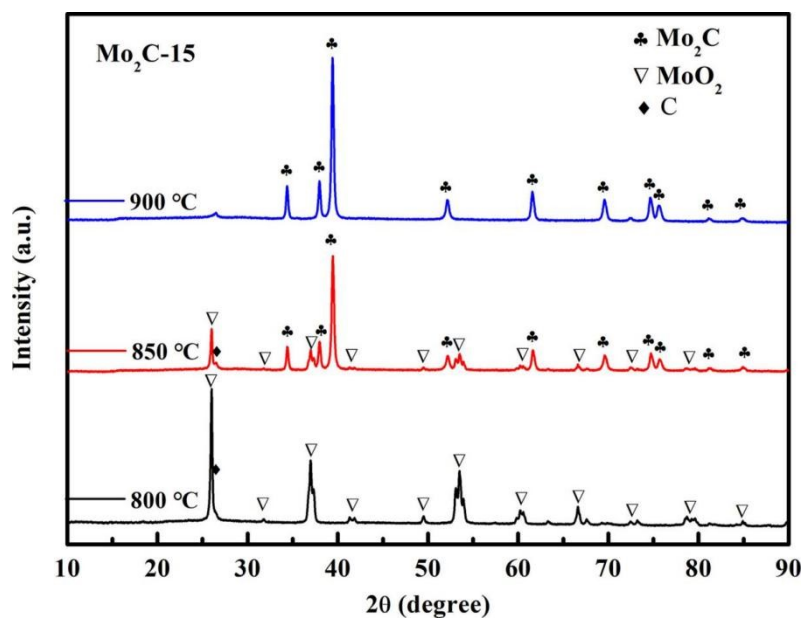

Fig. S3 XRD patterns of Mo<sub>2</sub>C-15 prepared at different temperature.

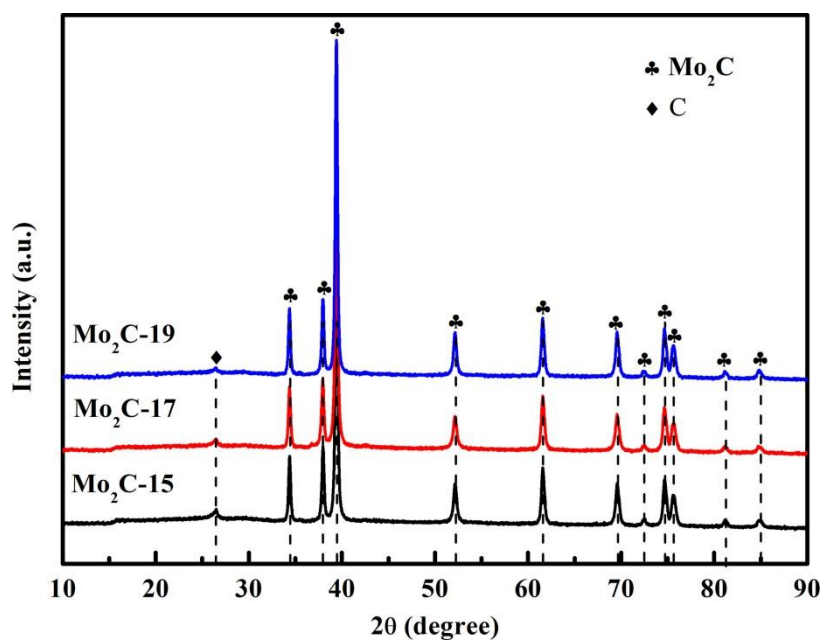

Fig. S4 XRD patterns of Mo<sub>2</sub>C-15, Mo<sub>2</sub>C-17, Mo<sub>2</sub>C-19 samples.

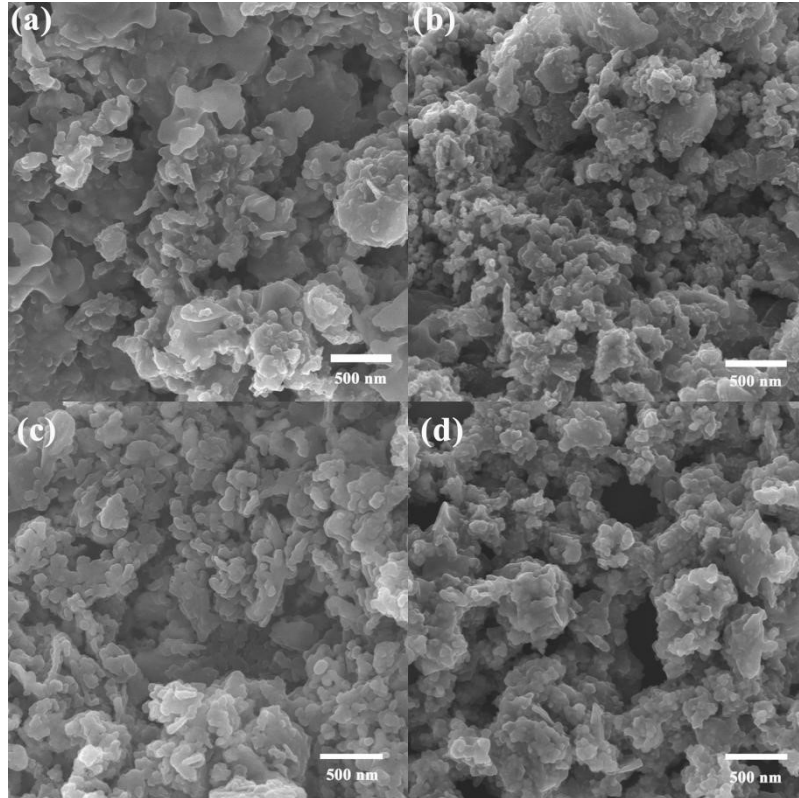

**Fig. S5** (a) SEM image of Ni-30/Mo<sub>2</sub>C-17. (b) SEM image of Ni-50/Mo<sub>2</sub>C-17. (c) SEM image of Mo<sub>2</sub>C-17. (d) SEM image of Ni-40/C.

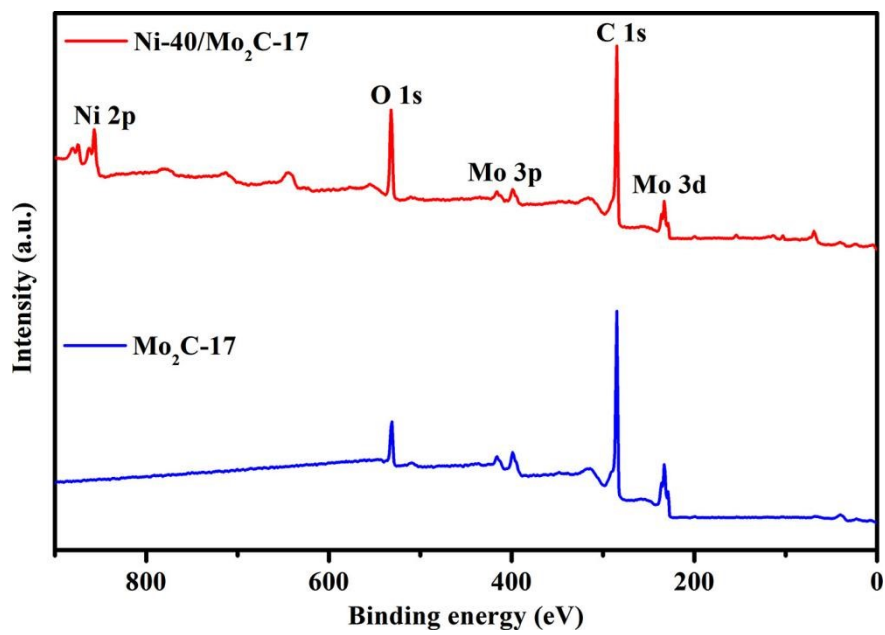

**Fig. S6** XPS full scans of Mo<sub>2</sub>C-17 and Ni-40/Mo<sub>2</sub>C-17.

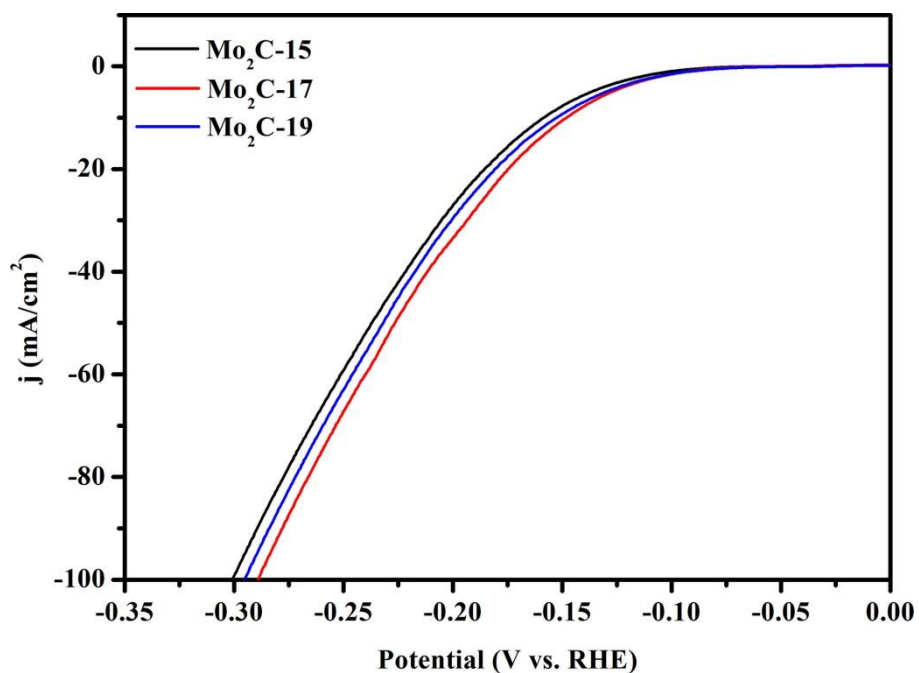

Fig. S7 Polarization curves of Mo<sub>2</sub>C prepared by molybdenum precursor with different content.

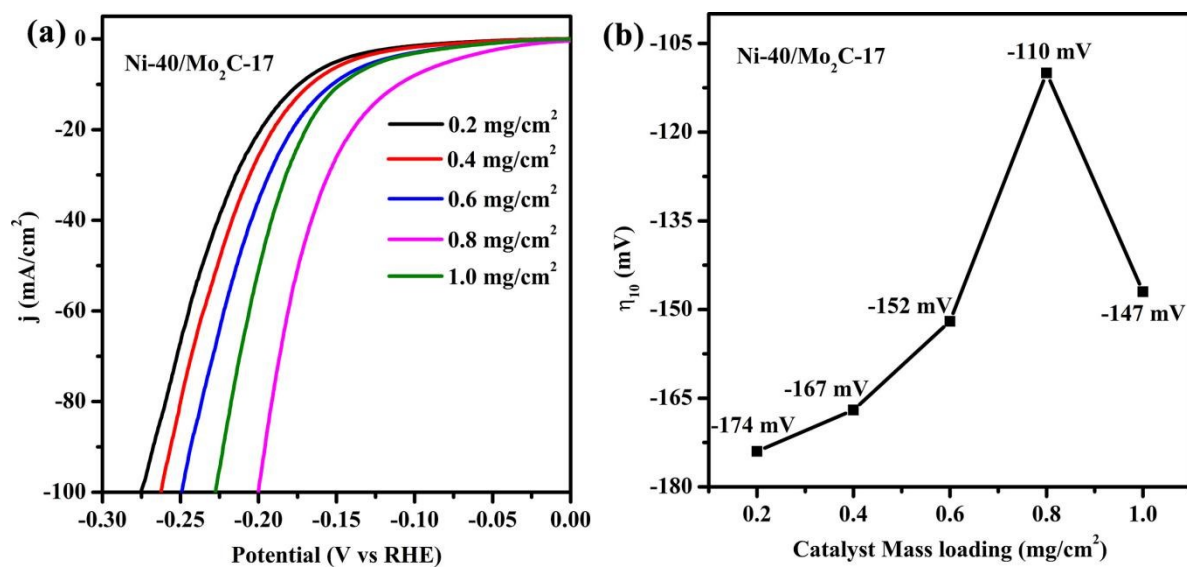

Fig. S8 (a) Polarization curves of Ni-40/Mo<sub>2</sub>C-17 under different mass loading, (b) the relationship between mass loading and  $\eta_{10}$  in 1 M KOH.

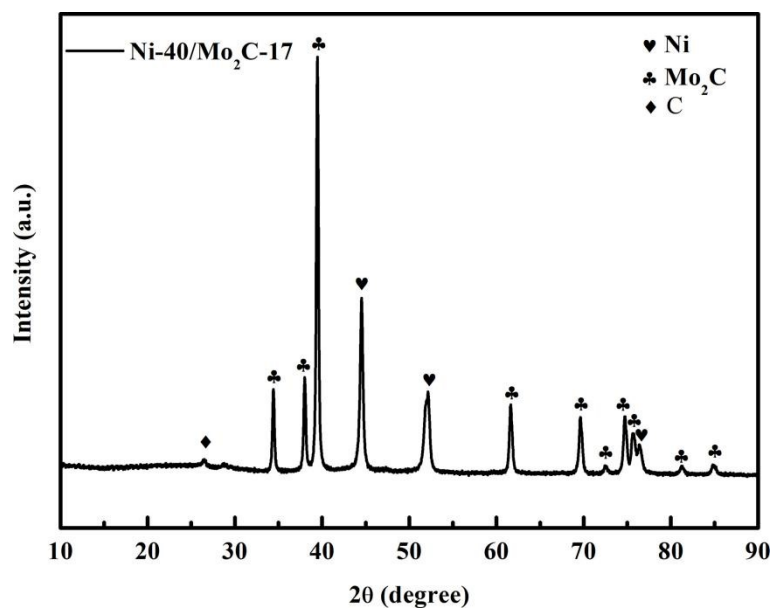

**Fig. S9** XRD characterization of Ni-40/Mo<sub>2</sub>C-17 catalyst after long-term stability test.

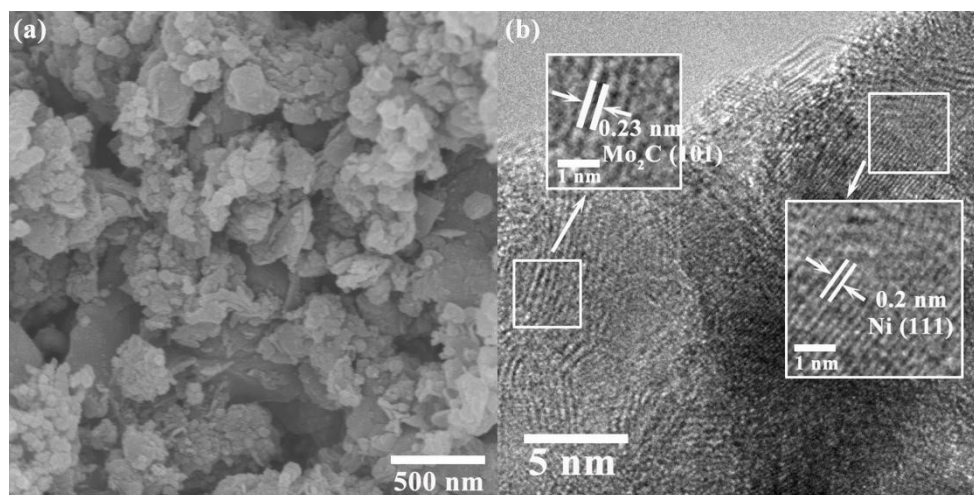

**Fig. S10** (a) SEM image of Ni-40/Mo<sub>2</sub>C-17 after long-term stability test. (b) HRTEM image of Ni-40/Mo<sub>2</sub>C-17 after long-term stability test.



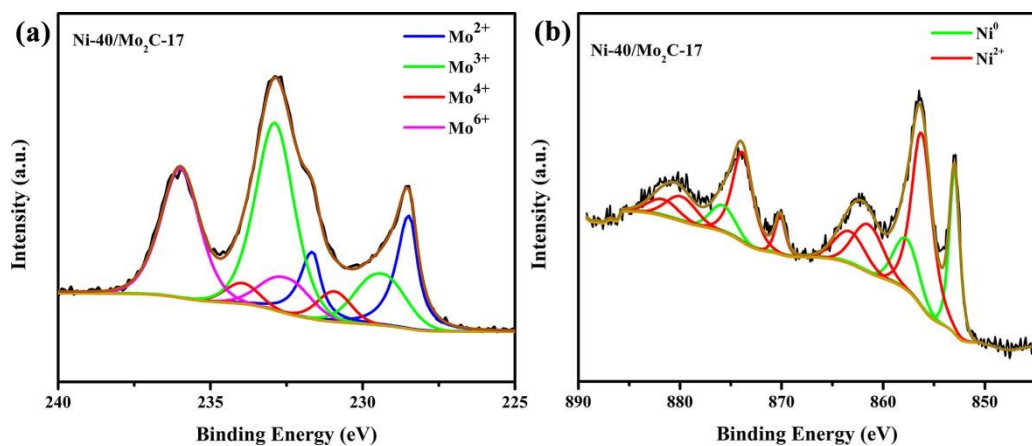

**Fig. S11** (a) Mo  $3d$  XPS spectra of Ni-40/Mo<sub>2</sub>C-17 after long-term stability test. (b) Ni  $2p$  XPS spectra of Ni-40/Mo<sub>2</sub>C-17 after long-term stability test.

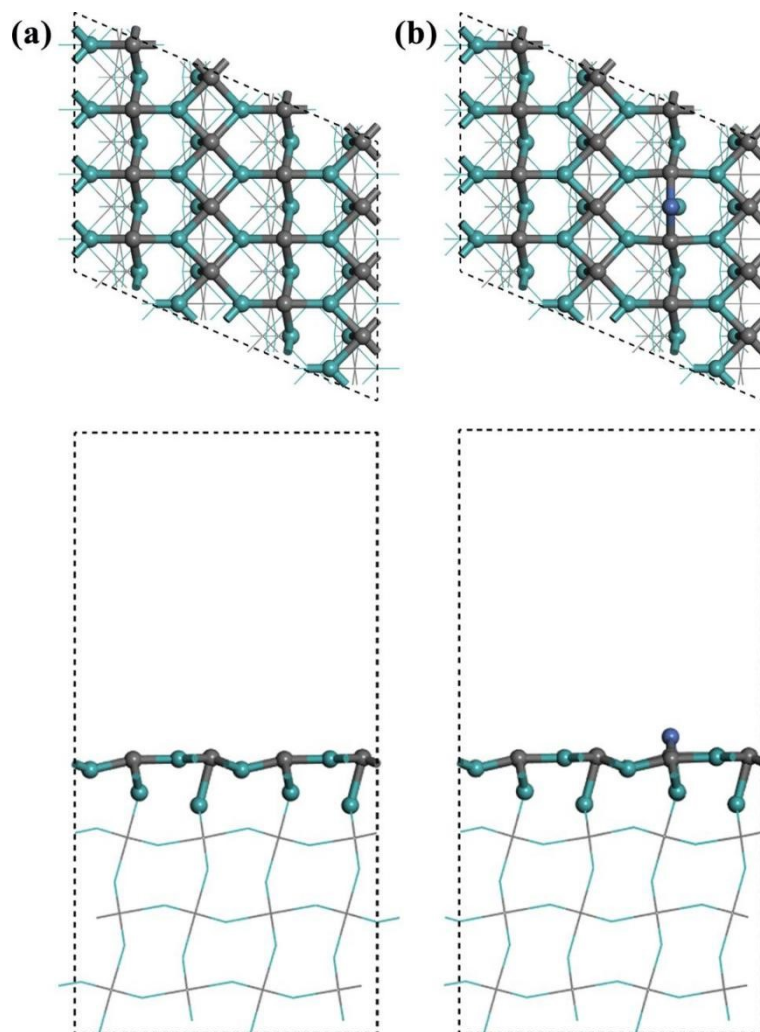

**Fig. S12** The optimized structures of (a) clean and (b) Ni doped Mo<sub>2</sub>C (101) surface.

**Table S1** Comparison of the HER performance for Ni-40/Mo<sub>2</sub>C-17 catalyst with other Mo<sub>2</sub>C-based or Ni-based catalysts in alkaline electrolytes (1 M KOH).

| Catalyst                            | Loading density<br>(mg cm <sup>-2</sup> ) | $\eta_{10}$<br>(mV) | Reference                                                       |
|-------------------------------------|-------------------------------------------|---------------------|-----------------------------------------------------------------|
| Mo <sub>2</sub> C-Ni                | 0.285                                     | 372                 | <i>New J. Chem.</i> 2017, 41, 12956                             |
| Ni/Mo <sub>2</sub> C-PC             | 0.5                                       | 179                 | <i>Chem. Sci.</i> 2017, 8, 968                                  |
| Ni/Mo <sub>2</sub> C(1:2)-<br>NCNFs | 1.4                                       | 143                 | <i>Adv. Energy Mater.</i> 2019, 9,<br>1803185                   |
| Mo <sub>2</sub> C                   | 0.8                                       | 190                 | <i>Angew. Chem. Int. Ed.</i> 2012, 51,<br>1270                  |
| Mo <sub>2</sub> C                   | 0.009                                     | 270                 | <i>J. Am. Chem. Soc.</i> 2015, 137,<br>7035                     |
| L-Mo <sub>2</sub> C                 | N/A                                       | 95.8                | <i>ACS Appl. Mater. Interfaces</i> ,<br>2018, <b>10</b> , 40500 |
| Mo <sub>2</sub> C-NCNT              | 3                                         | 257                 | <i>J. Mater. Chem. A</i> 2015, 3, 5783                          |
| Mo <sub>2</sub> C/carbon sheets     | 0.4                                       | 178                 | <i>ChemSusChem</i> 2017, 10, 3540                               |
| NiO/Ni-CNT                          | 0.28                                      | 80                  | <i>Nat. Commun.</i> 2014, 5, 4695                               |
| NiFe LDH/NF                         | N/A                                       | 210                 | <i>Science</i> 2014, 345, 1593                                  |
| NiFe LDH/rGO                        | 0.25                                      | 560                 | <i>ACS Nano</i> 2015, 89, 1977                                  |
| Ni-40/Mo <sub>2</sub> C-17          | 0.8                                       | 110                 | This work                                                       |
